# Supplementary material for: Self-Reported Olfactory Dysfunction and Diet Quality: Findings from the 2011–2014 National Health and Nutrition Examination Survey (NHANES)
Source: MDPI journal article supplement (doi:10.3390/nu13124561), 2021-12-20
Supplement: s1 [file s1]

**Supplementary Table S1.** Demographic, clinical, and lifestyle characteristics among the 2011-2014 NHANES study participants, ages 40 years and older†

| Demographic, Clinical, and Lifestyle Characteristics | Males 40-64 years<br>n=2014 | Males ≥65 years<br>n=1049 | Females 40-64 years<br>n=2216 | Females ≥65 years<br>n=1077 | p-value* |
|------------------------------------------------------|-----------------------------|---------------------------|-------------------------------|-----------------------------|----------|
| Race                                                 |                             |                           |                               |                             |          |
| Mexican American                                     | 2.7 (0.6)                   | 0.5 (0.1)                 | 2.6 (0.6)                     | 0.5 (0.1)                   | <0.0001  |
| Other Hispanic                                       | 1.8 (0.4)                   | 0.5 (0.1)                 | 2.1 (0.4)                     | 0.7 (0.2)                   |          |
| Non-Hispanic White                                   | 23.7 (1.3)                  | 10.1 (0.5)                | 25.1 (1.4)                    | 12.1 (0.5)                  |          |
| Non-Hispanic Black                                   | 3.7 (0.6)                   | 1.1 (0.2)                 | 4.7 (0.7)                     | 1.3 (0.2)                   |          |
| Non-Hispanic Asian                                   | 1.7 (0.2)                   | 0.5 (0.1)                 | 1.9 (0.3)                     | 0.7 (0.2)                   |          |
| Other Race – Including Multi-Racial                  | 0.9 (0.2)                   | 0.3 (0.1)                 | 0.8 (0.2)                     | 0.2 (0.1)                   |          |
| Education level                                      |                             |                           |                               |                             |          |
| High school or less                                  | 13.9 (1.0)                  | 5.0 (0.3)                 | 12.4 (0.8)                    | 7.2 (0.4)                   | <0.0001  |
| More than high school                                | 20.7 (0.9)                  | 7.8 (0.4)                 | 24.7 (1.4)                    | 8.3 (0.4)                   |          |
| Marital status <sup>b</sup>                          |                             |                           |                               |                             |          |
| Married or living with a partner                     | 24.4 (0.7)                  | 9.9 (0.4)                 | 23.7 (0.8)                    | 7.7 (0.35)                  | <0.0001  |
| Not Married                                          | 10.1 (0.8)                  | 3.0 (0.3)                 | 13.4 (0.7)                    | 7.9 (0.4)                   |          |
| Ratio of family income to poverty                    | 3.1 ± 0.1                   | 3.2 ± 0.1                 | 3.2 ± 0.2                     | 2.7 ± 0.1                   |          |
| Body mass index (kg/m <sup>2</sup> )                 | 29.3 ± 0.2                  | 28.5 ± 0.3                | 29.9 ± 0.3                    | 28.8 ± 0.2                  |          |
| Waist circumference (cm)                             | 104.2 ± 0.5                 | 105.7 ± 0.7               | 98.6 ± 0.6                    | 98.5 ± 0.7                  |          |
| Chronic disease score <sup>c</sup>                   | 0.23 ± 0.01                 | 0.70 ± 0.04               | 0.25 ± 0.01                   | 0.57 ± 0.03                 |          |
| Self-reported general health condition               |                             |                           |                               |                             |          |
| Excellent, very good, good                           | 28.1 (0.8)                  | 10.1 (0.5)                | 28.8 (1.1)                    | 12.5 (0.5)                  | 0.1      |
| Fair, Poor                                           | 6.3 (0.5)                   | 3.0 (0.2)                 | 7.7 (0.6)                     | 3.5 (0.3)                   |          |
| Physical activity <sup>d</sup>                       |                             |                           |                               |                             |          |
| Yes                                                  | 23.7 (0.9)                  | 7.0 (0.4)                 | 22.4 (0.8)                    | 7.2 (0.4)                   | <0.0001  |
| No                                                   | 10.8 (0.6)                  | 5.9 (0.3)                 | 14.6 (0.6)                    | 8.3 (0.4)                   |          |
| History of heavy drinking <sup>e</sup>               |                             |                           |                               |                             |          |
| Yes                                                  | 8.7 (0.7)                   | 2.7 (0.3)                 | 3.5 (0.4)                     | 0.7 (0.1)                   | <0.0001  |
| No                                                   | 25.7 (0.9)                  | 10.4 (0.5)                | 33.0 (0.9)                    | 15.2 (0.5)                  |          |
| Smoking history                                      |                             |                           |                               |                             |          |
| Never smokers                                        | 16.5 (0.8)                  | 4.8 (0.4)                 | 21.2 (1.0)                    | 9.2 (0.4)                   | <0.0001  |
| Former Smokers                                       | 9.7 (0.6)                   | 6.8 (0.3)                 | 8.1 (0.8)                     | 5.2 (0.3)                   |          |
| Current Smokers                                      | 8.3 (0.5)                   | 1.3 (0.2)                 | 7.7 (0.7)                     | 1.1 (0.2)                   |          |

†Data are presented as % (standard error of percent) for categorical variables and mean ± standard error of mean for continuous variables.

†All statistics weighted. Percentages may not reflect the expected value due to sampling weights and survey-weighted analyses.

†The following variables had missing values: education level (N=6352), marital status (N=6352), ratio of family income to poverty (N=5854), body mass index (N=6274), waist circumference (N=6082), self-reported general health condition (N=6048), history of heavy drinking (N=6015), and smoking history (N=6352)

\*p-values for differences between the four age/sex categories were obtained by Chi-square or two-tailed t-tests. Bolded items have significant difference across the four age/sex categories.

<sup>b</sup>Marital status is dichotomized as married or living with a partner—and not married (widowed, divorced, separated, never married).

<sup>c</sup>Chronic disease score is based on reported diabetes, cancer, stroke and heart attack

<sup>d</sup>Physical activity is defined as self-report of doing at least 10 minutes of vigorous or moderate-intensity work and/or recreational activity at least 3 days in a week.

<sup>e</sup>Heavy drinking history is defined as self-reported history of ever consuming 4-5 drinks every day.

**Supplementary Table S2.** Associations between self-reported olfactory function and dietary measures among NHANES 2011-2014 participants, ages 40 years and older, tested in survey-weighted regression models

| Dietary Measures                               | Unadjusted<br>Mean difference<br>(95% CI) | Model 1 <sup>a</sup><br>Mean difference<br>(95% CI) | Model 2 <sup>b</sup><br>Mean difference<br>(95% CI) | Model 3 <sup>c</sup><br>Mean difference<br>(95% CI) | Model 4 <sup>d</sup><br>Mean difference<br>(95% CI) |
|------------------------------------------------|-------------------------------------------|-----------------------------------------------------|-----------------------------------------------------|-----------------------------------------------------|-----------------------------------------------------|
| Energy intake                                  | 36.6 (−42.7, 115.9)                       | 24.6 (−57.9, 107.1)                                 | 32.7 (−49.5, 115.0)                                 | 33.0 (−50.0, 115.6)                                 | 33.9 (−49.9, 117.6)                                 |
| Energy density of foods (kcal/g)               | <b>0.08 (0.03, 0.13)**</b>                | <b>0.06 (0.002, 0.12)*</b>                          | <b>0.06 (0.002, 0.12)*</b>                          | <b>0.06 (0.004, 0.11)*</b>                          | <b>0.06 (0.00, 0.11)*</b>                           |
| HEI-2015 total score                           | <b>−1.67 (−2.74, −0.61)**</b>             | <b>−1.15 (−2.29, −0.01)*</b>                        | −1.09 (−2.22, 0.05)                                 | −1.07 (−2.19, 0.05)                                 | −0.84 (−1.93, 0.26)                                 |
| HEI-2015 moderation score                      | <b>−0.74 (−1.26, −0.22)**</b>             | <b>−0.71 (−1.27, −0.16)*</b>                        | <b>−0.67 (−1.22, −0.12)*</b>                        | <b>−0.67 (−1.22, −0.11)*</b>                        | <b>−0.56 (−1.11, −0.01)*</b>                        |
| HEI-2015 adequacy score                        | <b>−0.94 (−1.72, −0.15)*</b>              | −0.43 (−1.21, 0.35)                                 | −0.42 (−1.20, 0.36)                                 | −0.41 (−1.18, 0.36)                                 | −0.28 (−1.04, 0.49)                                 |
| % Energy from total fat                        | <b>0.97 (0.30, 1.63)**</b>                | <b>1.01 (0.25, 1.76)**</b>                          | <b>0.96 (0.21, 1.72)*</b>                           | <b>0.96 (0.22, 1.70)*</b>                           | <b>0.90 (0.16, 1.65)*</b>                           |
| % Energy from saturated fat                    | <b>0.48 (0.15, 0.80)**</b>                | <b>0.48 (0.13, 0.83)**</b>                          | <b>0.47 (0.12, 0.82)**</b>                          | <b>0.47 (0.12, 0.81)**</b>                          | <b>0.44 (0.09, 0.78)**</b>                          |
| % Energy from added sugar                      | <b>1.30 (0.60, 2.00)***</b>               | <b>0.95 (0.29, 1.62)**</b>                          | <b>1.00 (0.33, 1.67)**</b>                          | <b>1.00 (0.33, 1.66)**</b>                          | <b>1.03 (0.36, 1.71)*</b>                           |
| % Energy from alcoholic beverages              | −0.64 (−1.47, 0.20)                       | −0.86 (−1.74, 0.03)                                 | −0.77 (−1.66, 0.12)                                 | −0.77 (−1.65, 0.12)                                 | −0.69 (−1.59, 0.22)                                 |
| Total fruits (cup eq/1000 kcal)                | <b>−0.06 (−0.11, −0.01)*</b>              | −0.03 (−0.08, 0.02)                                 | −0.03 (−0.08, 0.02)                                 | −0.03 (−0.08, 0.02)                                 | −0.02 (−0.07, 0.03)                                 |
| Whole fruits (cup eq/1000 kcal)                | −0.04 (−0.08, 0.003)                      | −0.02 (−0.06, 0.03)                                 | −0.02 (−0.06, 0.03)                                 | −0.02 (−0.06, 0.03)                                 | −0.01 (−0.06, 0.03)                                 |
| Total vegetables (cup eq/1000 kcal)            | −0.08 (−0.16, 0.004)                      | −0.05 (−0.14, 0.03)                                 | −0.06 (−0.14, 0.03)                                 | −0.06 (−0.14, 0.03)                                 | −0.05 (−0.14, 0.03)                                 |
| Dark leafy greens and beans (cup eq/1000 kcal) | −0.01 (−0.04, 0.01)                       | −0.004 (−0.03, 0.02)                                | −0.002 (−0.03, 0.03)                                | −0.002 (−0.03, 0.03)                                | 0.00 (−0.03, 0.03)                                  |
| Whole grains (oz eq/1000 kcal)                 | −0.03 (−0.08, 0.02)                       | −0.03 (−0.08, 0.02)                                 | −0.03 (−0.09, 0.02)                                 | −0.03 (−0.09, 0.02)                                 | −0.02 (−0.08, 0.03)                                 |
| Dietary diversity Score <sup>e</sup>           | −0.19 (−0.50, 0.12)                       | −0.04 (−0.34, 0.26)                                 | −0.02 (−0.32, 0.28)                                 | −0.02 (−0.31, 0.28)                                 | 0.02 (−0.27, 0.32)                                  |

Abbreviations: Healthy Eating Index 2015 score (HEI).

Bolded items indicate significant mean differences between olfactory dysfunction and normal function (\* $p<0.05$ ; \*\* $p<0.01$ ; \*\*\* $p<0.001$ ).

<sup>a</sup>Adjusted for age, sex, income, education level, race/Hispanic origin, and smoking status.

<sup>b</sup>Adjusted for all variables in Model 1 and chronic disease score.

<sup>c</sup>Adjusted for all variables in Model 2 and physical activity.

<sup>d</sup>Adjusted for all variables in Model 3 and BMI.

<sup>e</sup> Dietary diversity defined as the number of unique food and beverage codes reported in a 24 hour recall, excluding plain water, in quantities of at least 15 g.

**Supplementary Table S3.** Associations between self-reported olfactory function and dietary attributes by age and sex among NHANES 2011-2014 participants, ages 40 years and older, tested in survey-weighted regression models

| Dietary Measures                               | Males 40-64 years                        | Males ≥65 years                          | Females 40-64 years                      | Females ≥65 years                        |
|------------------------------------------------|------------------------------------------|------------------------------------------|------------------------------------------|------------------------------------------|
|                                                | Mean difference <sup>a</sup><br>(95% CI) |
| Energy intake                                  | -45.9 (-211.6, 119.9)                    | 50.84 (-81.4, 183.0)                     | 77.05 (-36.8, 190.9)                     | 56.8 (-70.4, 184.0)                      |
| Energy density of foods (kcal/g)               | 0.06 (-0.04, 0.17)                       | 0.09 (0.00, 0.18)                        | -0.01 (-0.09, 0.08)                      | <b>0.13 (0.02, 0.24)*</b>                |
| HEI-2015 total score                           | -0.90 (-2.81, 1.01)                      | -1.46 (-4.38, 1.46)                      | -0.84 (-2.76, 1.08)                      | 0.71 (-1.45, 2.88)                       |
| HEI-2015 moderation score                      | 0.02 (-1.03, 1.07)                       | -0.67 (-2.17, 0.83)                      | <b>-1.31 (-2.13, -0.48)**</b>            | 0.05 (-1.06, 1.15)                       |
| HEI-2015 adequacy score                        | -0.92 (-2.11, 0.27)                      | -0.80 (-2.57, 0.98)                      | 0.47 (-0.97, 1.90)                       | 0.67 (-0.72, 2.06)                       |
| % Energy from total fat                        | 0.17 (-1.21, 1.55)                       | 0.06 (-1.41, 1.53)                       | <b>1.73 (0.48, 2.99)**</b>               | 1.39 (-0.36, 3.14)                       |
| % Energy from saturated fat                    | 0.02 (-0.64, 0.68)                       | 0.31 (-0.38, 1.00)                       | <b>0.85 (0.21, 1.50)*</b>                | 0.45 (-0.44, 1.33)                       |
| % Energy from added sugar                      | <b>1.61 (0.52, 2.69)**</b>               | 0.42 (-1.23, 2.07)                       | 0.57 (-0.80, 1.93)                       | 1.00 (-0.08, 2.09)                       |
| % Energy from alcoholic beverages              | 0.06 (-1.68, 1.81)                       | -1.06 (-2.50, 0.38)                      | <b>-1.83 (-3.00, -0.06)*</b>             | 0.03 (-1.10, 1.16)                       |
| Total fruits (cup eq/1000 kcal)                | 0.04 (-0.07, 0.15)                       | -0.10 (-0.21, 0.01)                      | -0.01 (-0.11, 0.08)                      | -0.09 (-0.24, 0.06)                      |
| Whole fruits (cup eq/1000 kcal)                | 0.04 (-0.05, 0.13)                       | -0.09 (-0.20, 0.02)                      | 0.00 (-0.08, 0.08)                       | -0.07 (-0.21, 0.07)                      |
| Total vegetables (cup eq/1000 kcal)            | -0.06 (-0.19, 0.07)                      | -0.03 (-0.24, 0.18)                      | 0.01 (-0.13, 0.15)                       | <b>-0.17 (-0.28, -0.05)**</b>            |
| Dark leafy greens and beans (cup eq/1000 kcal) | 0.01 (-0.05, 0.08)                       | -0.01 (-0.07, 0.05)                      | 0.01 (-0.04, 0.07)                       | -0.03 (-0.08, 0.02)                      |
| Whole grains (oz eq/1000 kcal)                 | -0.05 (-0.14, 0.04)                      | -0.03 (-0.18, 0.11)                      | 0.01 (-0.08, 0.10)                       | -0.01 (-0.15, 0.13)                      |
| Dietary diversity <sup>b</sup>                 | -0.22 (-0.80, 0.36)                      | -0.43 (-1.23, 0.38)                      | 0.23 (-0.19, 0.65)                       | 0.32 (-0.60, 1.25)                       |

Abbreviations: Healthy Eating Index 2015 score (HEI).

Bolded items indicate significant mean differences between olfactory dysfunction and normal function (\* $p<0.05$ ; \*\* $p<0.01$ ; \*\*\* $p<0.001$ ).

<sup>a</sup>Adjusted for age, income, education level, race/Hispanic origin, smoking status, chronic disease score, physical activity, and BMI.

<sup>b</sup> Dietary diversity defined as the number of unique food and beverage codes reported in a 24 hour recall, excluding plain water, in quantities of at least 15 g.
